# Supplementary material for: Comparative conformational analysis of peptides based on the two Cα-tetrasubstituted, Cβ-branched, chiral α-amino acids (αMe)Dip and (αMe)Val †
Source: Royal Society of Chemistry journal article supplement (doi:10.1039/a909856i), 2000-01-01
Supplement: a909856i.doc [file a909856i.doc]

# Supplementary data

**Comparative conformational analysis of peptides based on the two C-tetrasubstituted, C-**

**branched, chiral -amino acids (Me)Dip and (Me)Val**

**Yolanda Lapeña,*a* Pilar Lopez,*a* Carlos Cativiela,*a* Bernard Kaptein,*b* Quirinus B. Broxterman,*b* Johan Kamphuis,*c* Eric Mossel,*d* Cristina Peggion,*d* Fernando Formaggio,*d* Marco Crisma,*d* and Claudio Toniolo**d***

a Department of Organic Chemistry, Institute of Materials Science of Aragon, University of Zaragoza-CSIC, 50009 Zaragoza, Spain

*b DSM Research, Organic Chemistry and Biotechnology Section, P.O. Box 18, 6160 MD Geleen, The Netherlands*

*c DSM Specialty Intermediates, P.O. Box 5489, 6130 PL Sittard, The Netherlands*

*d Biopolymer Research Centre, CNR, Department of Organic Chemistry, University of Padova, 35131 Padova, Italy*

**Synthesis and characterization of the new derivatives and peptides**

**(Me)Dip derivatives**

***Z-D-(MeDip)-OH***

To a suspension of HCl·H-D-(Me)Dip-OH (297 mg, 1 mmol) in 0.5 N NaOH (4 ml) at 0 C NaHCO3 (84 mg, 1 mmol) and a solution of Z-OSu (249 mg, 1 mmol) in dioxane (2 ml) were added. The reaction mixture was stirred at room temperature for 4 d, by adding stepwise one mmol of Z-OSu and keeping the pH at 8-9 with 1 N NaOH. After removing the organic solvent under reduced pressure, 5% Na2CO3 (5 ml) was added and the solution was extracted with Et2O (10 ml). The aqueous layer was acidified to pH 3 with 10% KHSO4 and extracted with EtOAc. The organic solution was washed with H2O, dried over Na2SO4 and evaporated to dryness. The product was purified by column chromatography (silica gel 230-400, 60A; eluant: CHCl3/MeOH 8:2). Yield: 60%.

M. p.: 82-83 C (from EtOAc/light petroleum).

Rf1[[1]](#footnote-2) = 0.80; Rf2 = 0.95; Rf3 = 0.45.

[]D20 = + 14.1 (c = 1, MeOH).

IR(KBr): 3412, 1704 cm-1.

1H NMR (CDCl3):  7.39-7.25 [m, 15H, Z and (Me)Dip aromatic CH]; 5.43 [s, 1H, (Me)Dip NH]; 5.06 (m, 2H, Z CH2); 4.65 [s, 1H, (Me)Dip CH]; 1.78 [s, 3H, (Me)Dip CH3].

***Oxazol-5(4H)-one from Z-D,L-(Me)Dip-OH***

To a solution of Z-D,L-(Me)Dip-OH (97 mg, 0.25 mmol) in anhydrous CH2Cl2 (2 ml) at 0 C EDC·HCl (54 mg, 0.28 mmol) was added. After stirring at room temperature for 1 h EtOAc (15 ml) was added and the solution washed with H2O, 5% NaHCO3 and H2O, dried over Na2SO4 and evaporated to dryness. Yield: 72 %.

M. p.: 99-101 C (from EtOAc/light petroleum).

Rf1 = 0.90; Rf3 = 0.85.

IR(KBr): 1826, 1694 cm-1.

**(Me)Dip/Ala peptides**

***Z-D-(Me)Dip-D-Ala-OBut***

To a suspension of Z-D-(Me)Dip-OH (389 mg, 1 mmol) and HOAt (150 mg, 1.1 mmol) in CH2Cl2 (2 ml) at 0 C EDC·HCl (211 mg, 1.1 mmoli) was added. After 5 min a solution of H-D-Ala-OBu*t* [obtained by Pd-catalyzed hydrogenation of the corresponding Z-protected derivative (419 mg, 1.5 mmol)] in anhydrous CH2Cl2 (2 ml) was added. After stirring at room temperature for 1d EtOAc was added and the mixture washed with 10 % KHSO4, H2O, 5% NaHCO3 and H2O, dried over Na2SO4 and evaporated to dryness. The product was purified by column chromatography (silica gel 230-400, 60A; eluant: light petroleum/EtOAc 5:1). Yield: 95%. Oil.

Rf1 = 0.95; Rf2 = 0.95; Rf3 = 0.80.

[]D20 = + 41.4 (c = 0.5, MeOH).

IR (film): 3401, 1730, 1666 cm-1.

1H NMR (CDCl3):  7.40-7.19 [m, 15H, Z andMe)Dip aromatic CH]; 6.50 (d, 1H, Ala NH); 5.68 [s, 1H, (Me)Dip NH]; 5.06 (s, 2H, Z CH2); 4.92 [s, 1H, (Me)Dip CH]; 4.28 (m, 1H, Ala CH); 1.72 [s, 3H, (Me)Dip CH3]; 1.45 (s, 9H, OBu*t* CH3); 1.17 (d, 3H, AlaCH3).

***Z-D-Ala-D-(Me)Dip-D-Ala-OBut***

This peptide was prepared from Z-D-Ala-OH (246 mg, 1.5 mmol) and H-D-(Me)Dip-D-Ala-OBu*t* [obtained by Pd-catalyzed hydrogenation in MeOH of the corresponding Z-protected dipeptide (517 mg, 1 mmol)] as described above for Z-D-(Me)Dip-D-Ala-OBu*t*. Yield: 62%.

M. p.: 142-143 C (from EtOAc/light petroleum).

Rf1 = 0.90; Rf2 = 0.95; Rf3 = 0.50.

[]D20 = + 117.8 (c = 0.5, MeOH).

IR (KBr): 3359, 1733, 1700, 1677, 1622, 1525 cm-1.

1H NMR (CDCl3):  7.39-7.16 [m, 15H, Z andMe)Dip aromatic CH]; 7.07 [s, 1H, (Me)Dip NH]; 6.45 (d, 1H, Ala3 NH); 5.04 [s, 1H, (Me)Dip CH]; 5.00 (dd, 2H, Z CH2); 4.90 (d, 1H, Ala1 NH); 4.28 (m, 1H, Ala3 CH); 4.01 (m, 1H, Ala1 CH); 1.78 [s, 3H, (Me)Dip CH3]; 1.45 (s, 9H, OBu*t* CH3); 1.25 (d, 3H, Ala1CH3); 1.19 (d, 3H, Ala3CH3).

***Z-(Me)Dip-(D-Ala)****2****-OMe***

This compound was prepared from Z-D,L-(Me)Dip-OH (195 mg, 0.5 mmol) and H-(D-Ala)2-OMe [obtained by Pd-catalyzed hydrogenation in MeOH of the corresponding Z-protected dipeptide (308 mg, 1 mmol)] as described above for Z-D-(Me)Dip-D-Ala-OBu*t*. The two diastereoisomers were separated by HPLC (column: Vydac 218 TP1010; conditions: 43% CH3CN in 0.05% aqueous TFA for 20 min at a flow rate of 6 ml/min). The yield of the most abundant diastereoisomer was 45%.

M. p.: 72-73 C (from EtOAc/light petroleum).

Rf1 = 0.90; Rf2 = 0.95; Rf3 = 0.50.

[]D20 = + 25.4 (c = 0.5, MeOH).

IR (KBr): 3414, 3362, 1732, 1675, 1647 cm-1.

1H NMR (CDCl3):  7.40-7.27 [m, 15H, Z andMe)Dip aromatic CH]; 6.99 (d, 1H, Ala NH); 6.08 (d, 1H, Ala NH); 5.58 [s, 1H, (Me)Dip NH]; 5.07 (s, 2H, Z CH2); 4.66 [s, 1H, (Me)Dip CH]; 4.50 (m, 1H, Ala CH); 4.35 (m, 1H, Ala CH); 3.72 (s, 3H, OMe CH3), 1.71 [s, 3H, (Me)Dip CH3]; 1.34 (d, 3H, AlaCH3); 1.04 (d, 3H, AlaCH3).

***Z-(D-Ala)2-D-(Me)Dip-D-Ala-OBut***

This compound was prepared from Z-D-Ala-OH (246 mg, 1.5 mmol) and H-D-Ala-D-(Me)Dip-D-Ala-OBu*t* [obtained by Pd-catalyzed hydrogenation in MeOH of the corresponding Z-protected tripeptide (586 mg, 1 mmol)] as described above for Z-D-(Me)Dip-D-Ala-OBu*t*. Yield 80%.

M. p.: 148-149 C (from diethyl ether/light petroleum).

Rf1 = 0.85; Rf2 = 0.95; Rf3 = 0.50.

[]D20 = + 74.6 (c = 0.5, MeOH).

IR (KBr): 3417, 3364, 1719, 1672, 1654 cm-1.

1H NMR (CDCl3):  7.42-7.19 [m, 15H, Z andMe)Dip aromatic CH]; 6.83 [s, 1H, (Me)Dip NH]; 6.27 (m, 2H, Ala2 and Ala4 NH); 5.25 (d, 1H, Ala1 NH); 5.11 (s, 2H, Z CH2); 5.08 [s, 1H, (Me)Dip CH]; 4.25 (m, 1H, Ala CH); 4.16 (m, 1H, Ala CH); 4.06 (m, 1H, Ala1 CH); 1.77 [s, 3H, (Me)Dip CH3]; 1.45 (s, 9H, OBu*t* CH3); 1.26 (d, 3H, Ala1CH3); 1.19 (d, 6H, Ala2 and Ala4 CH3).

***Z-D-(Me)Dip-(D-Ala)2-D-(Me)Dip-D-Ala-OBut***

This compound was prepared from Z-D-(Me)Dip-OH (70 mg, 0.18 mmol) and H-(D-Ala)2-D-(Me)Dip-D-Ala-OBu*t* [obtained by Pd-catalyzed hydrogenation in MeOH of the corresponding Z-protected tetrapeptide (85 mg, 0.13 mmol)] as described above for Z-D-(Me)Dip-D-Ala-OBu*t*, by extending the reaction time to 2 d. The product was purified by column chromatography (silica gel 230-400, 60A; eluant: chloroform/EtOH 20:0.5). Yield 40%.

M. p.: 127-128 C (from chloroform/light petroleum).

Rf1 = 0.85; Rf2 = 0.95; Rf3 = 0.50.

[]D20 = + 42.0 (c = 0.5, MeOH).

IR (KBr): 3348, 1724, 1701, 1669, 1653 cm-1.

1H NMR (CDCl3):  7.37-7.13 [m, 25H, Z andMe)Dip aromatic CH]; 7.10 (br d, 1H, Ala3 NH); 6.83 [s, 1H, (Me)Dip4 NH]; 6.83 (d, 1H, Ala5 NH); 6.15 (d, 1H, Ala2 NH); 5.56 [s, 1H, (Me)Dip1 NH]; 5.06 (s, 2H, Z CH2); 4.94 [s, 1H, (Me)Dip4 CH]; 4.54 [s, 1H, (Me)Dip1 CH]; 4.27 (m, 1H, Ala5 CH); 4.15 (m, 1H, Ala2 CH); 4.05 (m, 1H, Ala3 CH); 1.73 [s, 3H, (Me)Dip4 CH3]; 1.70 [s, 3H, (Me)Dip1 CH3]; 1.46 (s, 9H, OBu*t* CH3); 1.34 (d, 3H, Ala3CH3); 1.12 (d, 3H, Ala5 CH3); 0.88 (d, 3H, Ala2 CH3).

**(Me)Val/Ala peptides**

***Z-(L-Ala)2-L-(Me)Val-L-Ala-OMe***

To a suspension of Z-L-Ala-OH (223 mg, 1 mmol) and HOBt (135 mg, 1 mmol) in CH2Cl2 (2 ml) at 0 oC, EDC·HCl (191 mg, 1 mmol) was added, followed, after one min, by a CH2Cl2 solution (2 ml) of H-L-Ala-L-(Me)Val-L-Ala-OMe [obtained by Pd-catalyzed hydrogenation of the corresponding Z-protected tripeptide methyl ester (285 mg, 0.68 mmol)]. After stirring overnight at room temperature, the reaction mixture was added with EtOAc and washed with 10% KHSO4, H2O, 5% NaHCO3, H2O, dried over Na2SO4 and evaporated to dryness. The oily product was purified by column chromatography (ICN silica 32-63, 60A; eluant: chloroform\EtOH 95:5). Yield 81%. Oil.

Rf1 = 0.70; Rf2 = 0.90; Rf3 = 0.35.

[]D20 = -26.3º (c = 0.5, MeOH).

IR (film): 3321, 1742, 1703, 1660, 1535 cm-1.

1H NMR (CDCl3):  7.33 (m, 6H, Z aromatic CH and Ala NH); 6.95 (d, 1H, Ala NH); 6.81 [s, 1H, (Me)Val NH]; 5.59 (d, 1H, Ala1 NH); 5.10 (m, 2H, Z CH2); 4.53 (m, 1H, Ala CH); 4.45 (m, 1H, Ala CH); 4.28 (m, 1H, Ala1 CH); 3.70 (s, 3H, OMe CH3); 2.45 [m, 1H, (Me)Val CH]; 1.42 [m, 12H, (Me)Val CH3 and 3 Ala CH3); 0.91 [dd, 6H, (Me)Val CH3].

***Z-L-(Me)Val-(L-Ala)2-L-(Me)Val-L-Ala-OMe***

To a suspension of Z-L-(Me)Val-OH (106 mg, 0.4 mmol) and HOAt (136 mg, 0.4 mmol) in CH2Cl2 (2 ml) at 0C EDC·HCl (77 mg, 0.4 mmol) was added, followed, after one min, by a CH2Cl2 solution (2 ml) of H-(L-Ala)2-L-(Me)Val-L-Ala-OMe [obtained by Pd-catalyzed hydrogenation of the corresponding Z-protected tetrapeptide methyl ester (170 mg, 0.35 mmol)]. After 3 h NMM (0.033 ml, 0.30 mmol) was added. The reaction mixture was stirred overnight, then added with EtOAc and washed with 10% KHSO4, H2O, 5% NaHCO3, H2O, dried over Na2SO4 and evaporated to dryness. Yield 86 %.

M.p.: 168-169 C (from EtOAc/light petroleum).

Rf1 = 0.50; Rf2 = 0.90; Rf3 = 0.20.

[]D20 = -21.0º (c = 0.5, MeOH).

IR (KBr): 3431, 3413, 3318, 1737, 1694, 1675, 1662, 1533 cm-1.

1H NMR (CDCl3):  7.75 (d, 1H, Ala5 NH); 7.62 (d, 1H, Ala3 NH); 7.35 (m, 5H, Z aromatic CH); 6.67 [s, 1H, (Me)Val4 NH]; 6.22 (d, 1H, Ala2 NH); 5.13 [s, 1H, (Me)Val1 NH]; 5.10 (m, 2H, Z CH2); 4.50 (m, 1H, Ala5 CH); 4.26 (m, 2H, Ala2 and Ala3 CH); 3.69 (s, 3H, OMe CH3); 2.47 [m, 1H, (Me)Val4 CH]; 1.93 [m, 1H, (Me)Val1 CH]; 1.41 (m, 15H, 2 Val CH3 and 3 Ala CH3); 0.95 (m, 12H, 2 Val CH3).

**(Me)Dip/Gly peptides**

***Z-D-(Me)Dip-Gly-OBut***

This compound was prepared from Z-D-(Me)Dip-OH (581 mg, 1.5 mmol) and H-Gly-OBu*t* [obtained by Pd-catalyzed hydrogenation in MeOH of Z-Gly-OBu*t* (596 mg, 2.25 mmol)] as described above for Z-D-(Me)Dip-D-Ala-OBu*t*, by extending the reaction time to 3 d and adding, after 2 d, HOAt (112 mg, 0.82 mmol) and EDC·HCl (163 mg, 0.82 mmol). The product was purified by column chromatography (silica gel 70-200, 60A; eluant: hexane/AcOEt 8:2). Yield: 80%. Oil.

Rf1 = 0.95; Rf2 = 0.95; Rf3 = 0.80.

[]D20 = +12.9 (c = 0.5, MeOH).

IR (film): 3399, 1732, 1668 cm-1.

1H NMR (CDCl3):  7.40-7.20 [m, 15 H, Z and (Me)Dip aromatic CH]; 6.29 (t, 1H, Gly NH); 5.75 [s, 1H, (Me)Dip NH]; 5.05 (m, 2H, Z CH2); 4.92 [s, 1H, (Me)Dip CH]; 3.81 (m, 2H, Gly 2 CH); 1.76 [s, 3H, (Me)Dip CH3]; 1.44 (s, 9H, OBu*t* CH3).

***Z-Gly-D-(Me)Dip-Gly-OBut***

This compound was prepared from Z-Gly-OH (335 mg, 1.6 mmol) and H-D-(Me)Dip-Gly-OBu*t* [obtained by Pd-catalyzed hydrogenation in MeOH of the Z-protected dipeptide *tert*-butyl ester (400 mg, 0.8 mmol)] according to the procedure described above for Z-D-(Me)Dip-Gly-OBu*t*. The product was purified by column chromatography (silica gel 70-200, 60A; eluant: CH2Cl2/AcOEt 6:4). Yield: 68%.

M.p.: 78-80 C (from EtOAc/light petroleum).

Rf1 = 0.80; Rf2 = 0.95; Rf3 = 0.40.

[]D20 = +54.8 (c = 0.5, MeOH).

IR (KBr): 3369, 1730, 1680 cm-1.

1H NMR (CDCl3):  7.43-7.16 [m, 15 H, Z and (Me)Dip aromatic CH]; 6.97 [s, 1H, (Me)Dip NH]; 6.26 (br m, 1H, Gly3 NH); 5.18 (br m, 1H, Gly1 NH); 5.05 (m, 2H, Z CH2); 5.03 [s, 1H, (Me)Dip CH]; 3.80 (m, 2H, Gly3 2 CH); 3.66 (2 dd, 2H, Gly1 2 CH); 1.79 [s, 3H, (Me)Dip CH3]; 1.43 (s, 9H, OBu*t* CH3).

***Z-D-(Me)Dip-(Gly)2-OBut***

This compound was prepared from Z-D-(Me)Dip-OH (93 mg, 0.24 mmol) and H-(Gly)2-OBu*t* [obtained by Pd-catalyzed hydrogenation in MeOH of Z-(Gly)2-OBu*t* (155 mg, 0.48 mmol)] according to the procedure described above for Z-D-(Me)Dip-Gly-OBu*t*. The product was purified by column chromatography (silica gel 70-200, 60A; eluant: CH2Cl2/AcOEt 6:4). Yield: 30%.

M.p.: 60-62 C (from EtOAc/light petroleum).

Rf1 = 0.80; Rf2 = 0.95; Rf3 = 0.40.

[]D20 = -7.5 (c = 0.5, MeOH).

IR (KBr): 3407, 3342, 1707, 1658, 1650 cm-1.

1H NMR (CDCl3):  7.40-7.20 [m, 15 H, Z and (Me)Dip aromatic CH]; 6.85 (br m, 1H, Gly NH); 6.43 (m, 1H, Gly NH); 5.53 [s, 1H, (Me)Dip NH]; 5.04 (m, 2H, Z CH2); 4.64 [s, 1H, (Me)Dip CH]; 4.00-3.60 (m, 4H, 2 Gly 4 CH); 1.71 [s, 3H, (Me)Dip CH3]; 1.41 (s, 9H, OBu*t* CH3).

***Z-(Gly)2-D-(Me)Dip-Gly-OBut***

This compound was prepared from Z-Gly-OH (100 mg, 0.48 mmol) and H-Gly-D-(Me)Dip-Gly-OBu*t* [obtained by Pd-catalyzed hydrogenation in MeOH of the corresponding Z-protected tripeptide *tert*-butyl ester (134 mg, 0.24 mmol)] according to the procedure described above for Z-D-(Me)Dip-Gly-OBu*t*. The product was purified by column chromatography (silica gel 70-200, 60A; eluant: CH2Cl2/AcOEt 3:6). Yield: 62%.

M.p.: 82-84 C (from EtOAc/light petroleum).

Rf1 = 0.55; Rf2 = 0.95; Rf3 = 0.35.

[]D20 = +24.6 (c = 0.5, MeOH).

IR (KBr): 3339, 1726, 1668 cm-1.

1H NMR (CDCl3):  7.35-7.19 [m, 15 H, Z and (Me)Dip aromatic CH]; 6.94 [s, 1H, (Me)Dip NH]; 6.56 (br m, 1H, Gly NH); 6.14 (br m, 1H, Gly NH); 5.46 (br m, 1H, Gly NH); 5.11 (s, 2H, Z CH2); 4.95 [s, 1H, (Me)Dip CH]; 3.91-3.55 (m, 6H, 3 Gly 6 CH); 1.78 [s, 3H, (Me)Dip CH3]; 1.40 (s, 9H, OBu*t* CH3).

***Z-D-(Me)Dip-(Gly)2-D-(Me)Dip-Gly-OBut***

This compound was synthesized from Z-D-(Me)Dip-Gly-OH [prepared by treatment of the corresponding *tert*-butyl ester with a 1:1 TFA/CH2Cl2 solvent mixture (116 mg, 0.23 mmol)] and H-Gly-D-(Me)Dip-Gly-OBu*t* [obtained by Pd-catalyzed hydrogenation in MeOH of the corresponding Z-protected tripeptide *tert*-butyl ester (117 mg, 0.21 mmol)] according to the procedure described above for Z-D-(Me)Dip-Gly-OBu*t*. The product was purified by column chromatography (silica gel 70-200, 60A; eluant: CH2Cl2/AcOEt 3:6). Yield: 65%.

M.p.: 128-130 C (from EtOAc/light petroleum).

Rf1 = 0.75; Rf2 = 0.95; Rf3 = 0.40.

[]D20 = +8.1 (c = 0.5, MeOH).

IR (KBr): 3334, 1736, 1662 cm-1.

1H NMR (CDCl3):  7.30-7.05 [m, 26 H, Z and (Me)Dip aromatic CH and Gly3 NH]; 6.77 [s, 1H, (Me)Dip4 NH]; 6.54 (br m, 1H, Gly5 NH); 6.40 (br m, 1H, Gly2 NH); 5.42 [s, 1H, (Me)Dip1 NH]; 4.96 (m, 2H, Z CH2); 4.86 [s, 1H, (Me)Dip CH]; 4.54 [s, 1H, (Me)Dip CH]; 3.80-3.40 (m, 6H, 3 Gly 6 CH); 1.73 [s, 3H, (Me)Dip CH3]; 1.69 [s, 3H, (Me)Dip CH3]; 1.34 (s, 9H, OBu*t* CH3).

**(Me)Val/Gly peptides**

***Z-(Gly)2-L-(Me)Val-Gly-OBut***

To a solution of Z-Gly-OH (1.89 g, 9.80 mmol) in CH2Cl2 (30 ml) at 0°C HOAt (1.33 g, 9.80 mmol) and EDC·HCl (1.88 g, 9.80 mmol) were added. After 2 min H-Gly-L-(Me)Val-Gly-OBu*t* [obtained by Pd-catalyzed hydrogenation of the corresponding Z-protected tripeptide *tert*‑butyl ester (2.56 g, 6.13 mmol)] was added, followed by NMM (1.08 ml, 9.80 mmol). The reaction mixture was stirred at room temperature for 2 d. Then, EtOAc was added and the mixture was extracted with 10% KHSO4, H2O, 5% NaHCO3, H2O, dried over Na2SO4, and concentrated. The product, which precipitated by adding light petroleum, was filtered and dried over P2O5. Yield: 85%.

M.p.: 131-132 C (from EtOAc/light petroleum).

Rf1 = 0.60; Rf2 = 0.90; Rf3 = 0.30.

[]D20 = +9.5 (c 0.5, MeOH).

IR (KBr): 3329, 1713, 1662, 1529 cm-1.

1H NMR (CDCl3):  7.35 (m, 5H, Z aromatic CH); 6.75 (m, 2H, Gly2 and Gly4 NH); 6.60 [s, 1H, (Me)Val NH]; 5.46 (br m, 1H, Gly1 NH); 5.13 (s, 2H, Z CH2); 4.05-3.75 (m, 6H, 3 Gly 6 CH), 2.36 [m, 1H, (Me)Val CH]; 1.53 [s, 3H, (Me)Val CH3]; 1.45 (s, 9H, OBu*t* CH3); 0.94 [dd, 6H, (Me)Val CH3].

***Z-L-(Me)Val-(Gly)2-L-(Me)Val-Gly-OBut***

This compound was prepared from Z-L-(Me)Val-OH (2.20 g, 8.30 mmol) and H-Gly-Gly-L-(Me)Val-Gly-OBu*t* [obtained by Pd-catalyzed hydrogenation of the corresponding Z-protected tetrapeptide *tert*‑butyl ester (1.97 g, 4.15 mmol)] as described above forZ-(Gly)2-L-(Me)Val-Gly-OBu*t*. Yield: 70%.

M.p.: 92‑94 °C (from EtOAc/light petroleum).

Rf1 = 0.50; Rf2 = 0.85; Rf3 = 0.25.

[]D20 = +15.0º (c 0.5, MeOH).

IR (KBr): 3331, 1744, 1664, 1528 cm‑1.

1H NMR (CDCl3):  8.05 (br m, 1H, Gly3 NH); 7.35 (m, 5H, Z aromatic CH); 7.15 (m, 1H, Gly5 NH); 6.89 (m, 1H, Gly2 NH); 6.80 [s, 1H, (Me)Val4 NH]; 5.34 [s, 1H, (Me)Val1 NH], 5.08 (s, 2H, Z CH2); 4.13‑3.66 (m, 6H, 3 Gly 6 CH); 2.32 [m, 1H, (Me)Val CH]; 2.00 [m, 1H, (Me)Val CH]; 1.52 (s, 3H, (Me)Val CH3]; 1.46 [s, 3H, (Me)Val CH3]; 1.43 (s, 9H, OBu*t* CH3); 0.93 [m, 12H, 2 (Me)Val 4 CH3].

1. TLC: Rf1 = chloroform-ethanol 9:1; Rf2 = butan-1-ol-acetic acid-water 6:2:2; Rf3 = toluene-ethanol 7:1. [↑](#footnote-ref-2)
